# Supplementary material for: Preparation and characterization of new solid electrolytes Na3−xZn1−xAl1+xS4
Source: Royal Society of Chemistry journal article supplement (doi:10.1039/d4lf00275j), 2024-01-01
Supplement: d4lf00275j1.pdf [file d4lf00275j1.pdf]

## Supporting Information

### Preparation and characterization of the new solid electrolytes

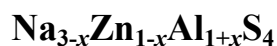

Tomoya Otono, Hamdi Ben Yahia, Chie Hotehama, Kota Motohashi, Atsushi Sakuda,\*

Akitoshi Hayashi\*

Department of Applied Chemistry, Graduate School of Engineering, Osaka Metropolitan  
University, 1-1 Gakuen-cho, Naka-ku, Sakai, Osaka 599-8531, Japan.

**\*Corresponding author:**

Atsushi Sakuda (Associate Professor), Akitoshi Hayashi (Professor)

Tel.: +81-72-2549331; Fax.: +81-72-2549334

E-mail address: [saku@omu.ac.jp](mailto:saku@omu.ac.jp), [akitoshihayashi@omu.ac.jp](mailto:akitoshihayashi@omu.ac.jp)

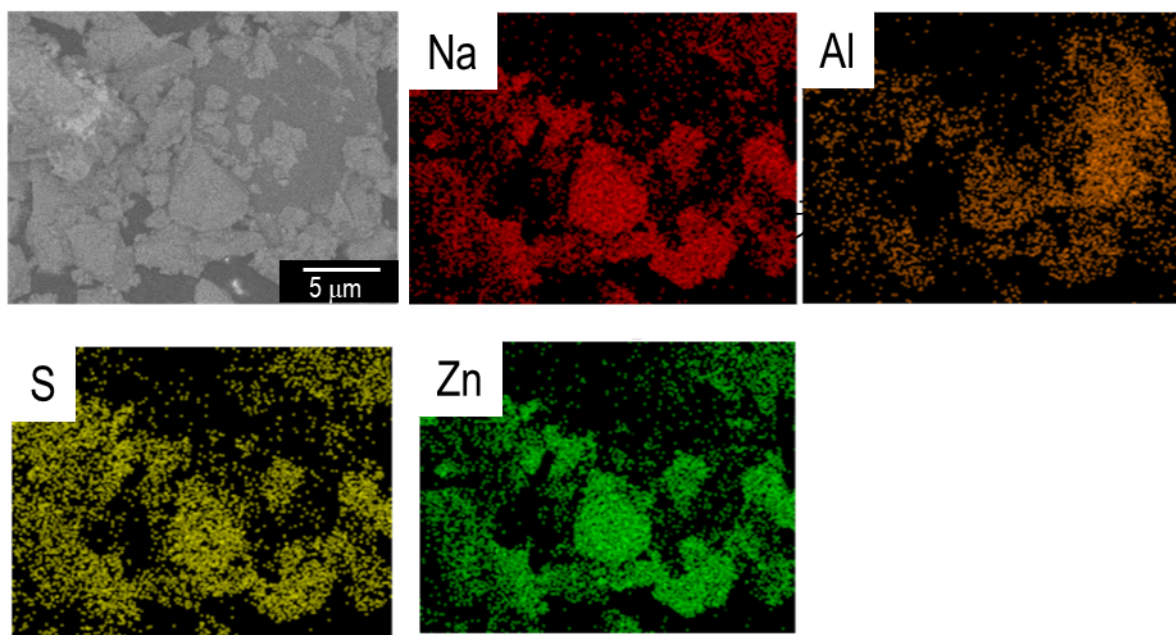

Figure S1. SEM-EDS mappings of  $\text{Na}_3\text{ZnAlS}_4$  electrolyte.

**Table S1.** The unit cell parameters  $a$ ,  $c$ , and  $V$  of  $\text{Na}_{3-x}\text{Zn}_{1-x}\text{Al}_{1+x}\text{S}_4$ , obtained by the Le Bail fitting method.

| $x$  | $a$ (Å)    | $c$ (Å)    | $V$ (Å <sup>3</sup> ) |
|------|------------|------------|-----------------------|
| 0    | 12.9206(1) | 18.5822(2) | 3102.12(4)            |
| 0.1  | 12.8942(1) | 18.6374(2) | 3098.66(6)            |
| 0.15 | 12.8499(3) | 18.6787(5) | 3084.25(12)           |
| 0.2  | 12.8408(3) | 18.6974(6) | 3082.93(14)           |

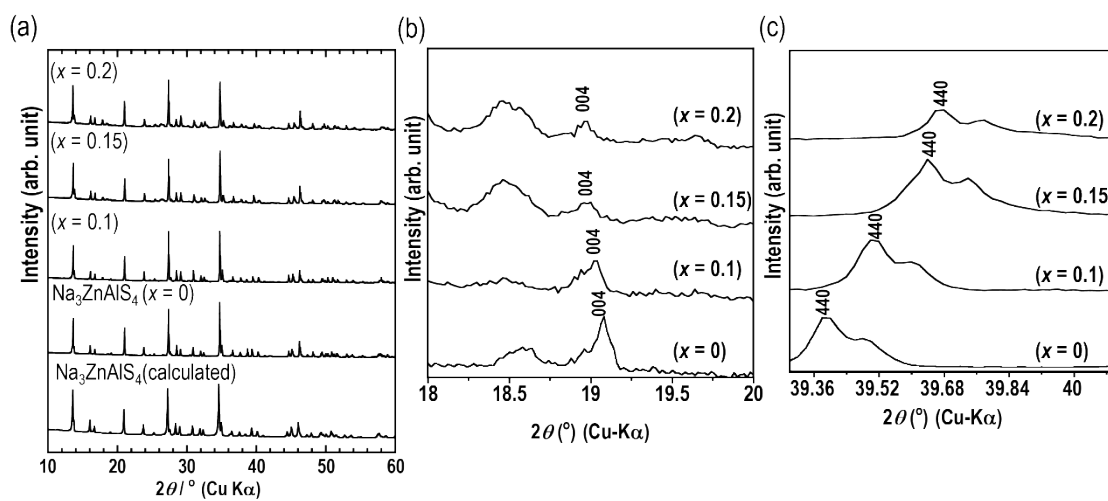

**Figure S2.** (a) XRD patterns of  $\text{Na}_{3-x}\text{Zn}_{1-x}\text{M}_{1+x}\text{S}_4$  ( $x = 0, 0.1, 0.15, 0.2$ ), (b) Zoom on the Bragg peak 004, and (c) Zoom on the Bragg peak 440.

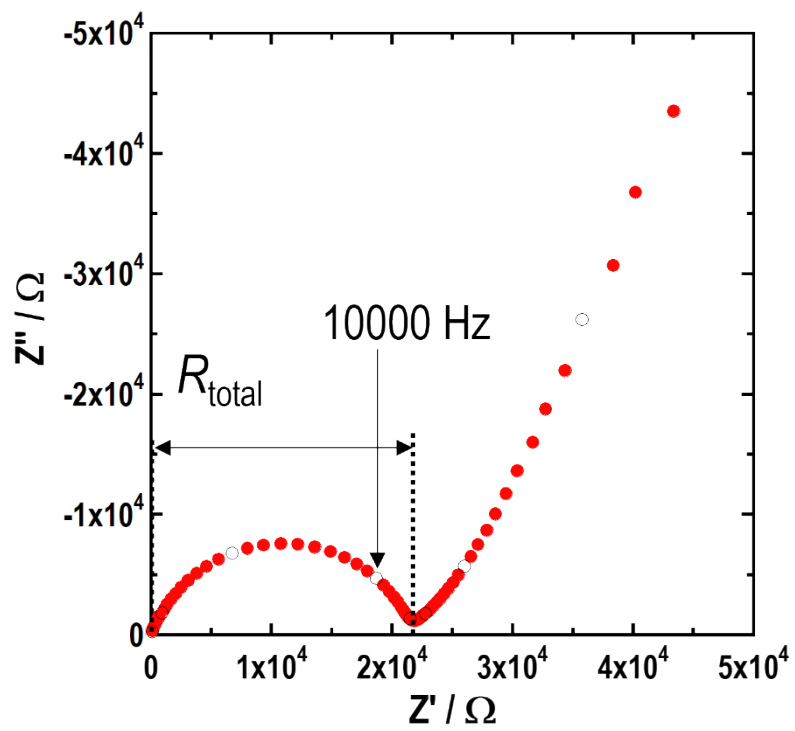

**Figure S3.** Nyquist plot of  $\text{Na}_{2.9}\text{Zn}_{0.9}\text{Al}_{1.1}\text{S}_4$  at  $29.8 \text{ }^\circ\text{C}$ .
